# Supplementary material
Source: publisher figshare collection journal article supplement (https://acs.figshare.com/ndownloader/files/4042216)
Supplement: Supplementary file 1 [file 4042216]

## SUPPORTING INFORMATION FOR

### Resistive Random Access Memory Enabled by Carbon Nanotube Crossbar Electrodes

Cheng-Lin Tsai,<sup>†,‡</sup> Feng Xiong,<sup>§,||,⊥</sup> Eric Pop,<sup>§,||,⊥</sup> and Moonsub Shim<sup>\*,†,‡,⊥</sup>

<sup>†</sup>Department of Materials Science and Engineering, <sup>‡</sup>Frederic Seitz Materials Research Laboratory, <sup>§</sup>Department of Electrical and Computer Engineering, <sup>||</sup>Micro and Nanotechnology Laboratory, and <sup>⊥</sup>Beckman Institute, University of Illinois, Urbana, Illinois 61801, USA.

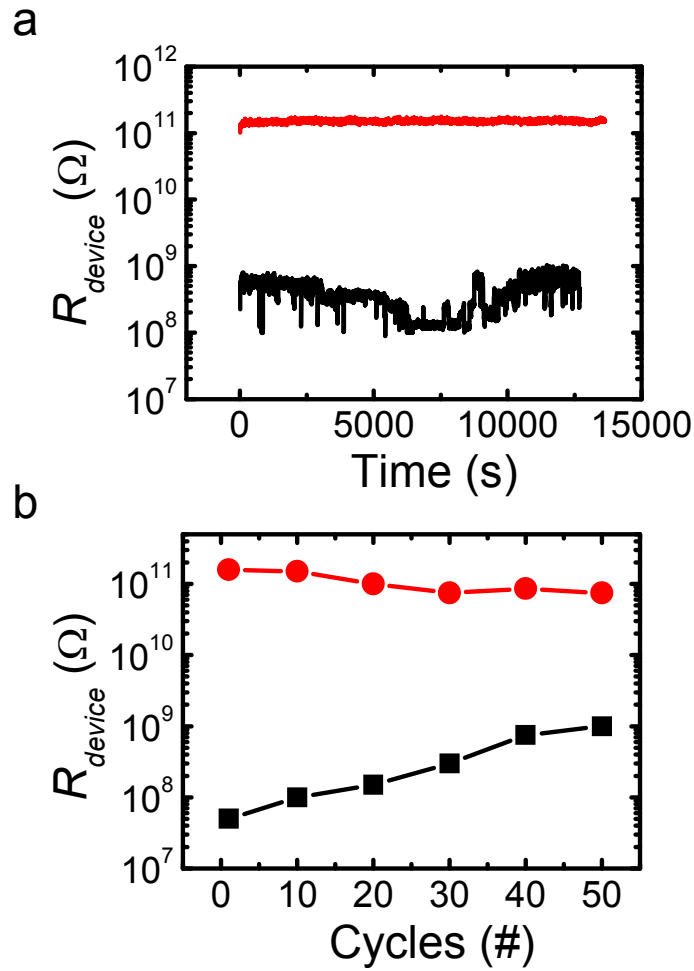

**Figure S1.** (a) Retention with top electrode voltage = 1.5 V and (b) endurance behavior of a metallic CNT (two CNTs on top)/ $\text{AlO}_x$ /metallic CNT (one CNT on bottom) RRAM at room temperature. The black squares represent LRS and the red circles represent HRS.

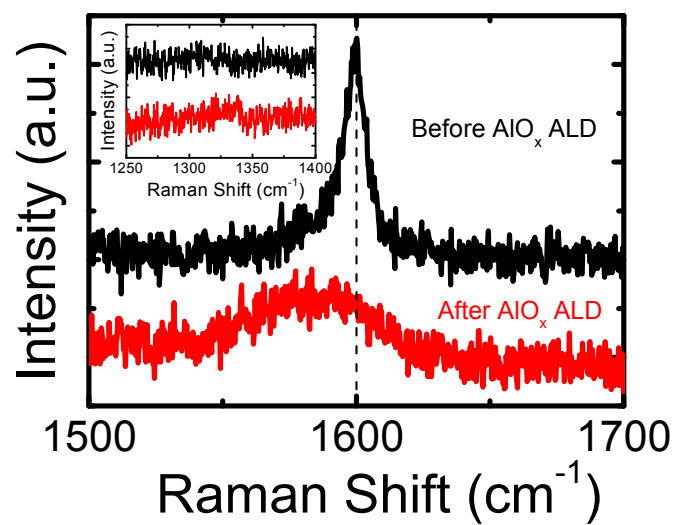

**Figure S2.** G-band and D-band (inset) regions of the Raman spectrum of a metallic CNT before (black) and after (red) atomic layer deposition of  $\text{AlO}_x$ . The Raman spectra are offset for clarity. The dash line is included as a guide.

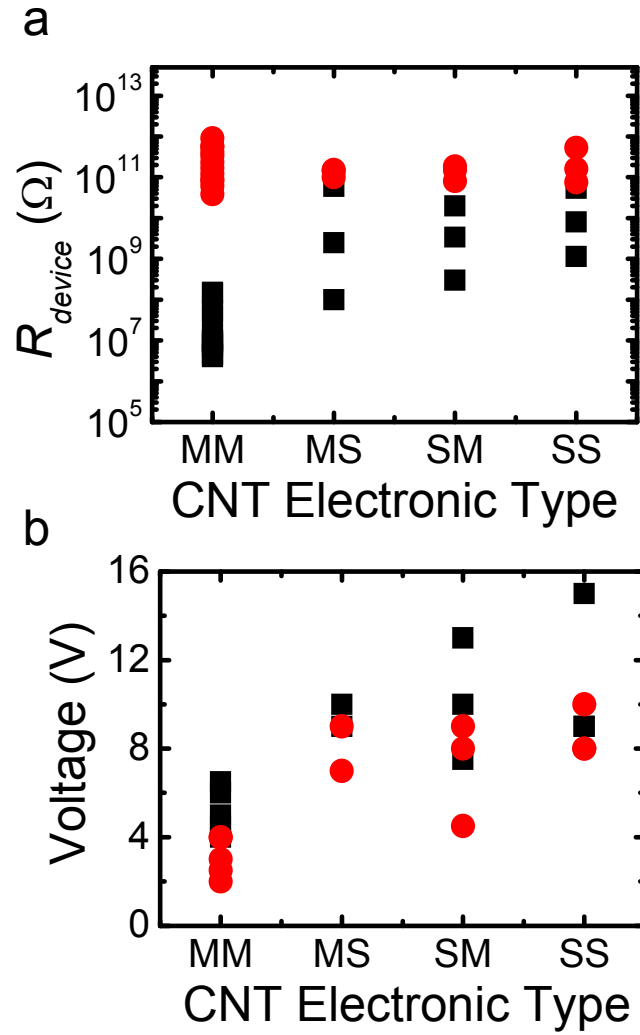

**Figure S3.** (a) Resistive Random Access Memory (RRAM) device resistance of high-resistance state (HRS) (red circles) and low-resistance state (LRS) (black squares). (b) Set (black squares) and reset (red circles) voltages as a function of CNT electronic type. Only devices that can undergo multiple switching cycles are plotted in (b). The letters M and S stand for metallic and semiconducting, respectively with the first letter representing the electronic type of the top CNT electrode and the second letter representing that of the bottom CNT electrode (*e.g.*, “MS” refers to metallic top CNT electrode and semiconducting bottom CNT electrode).

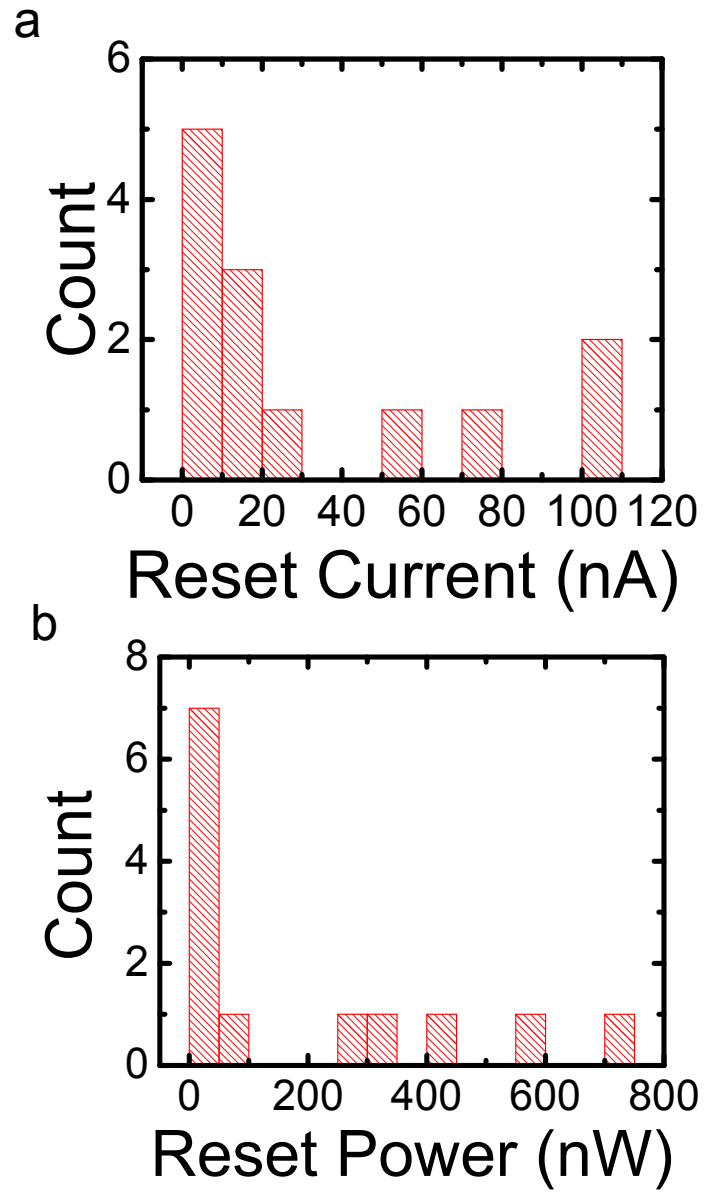

**Figure S4.** Histogram of (a) reset current (bin size of 10 nA) and (b) reset power (bin size of 50 nW) of AlO<sub>x</sub>/CNT crossbar RRAMs.
